# Supplementary material
Source: PubMed Central journal article supplement (PMC4559817)
Supplement: cr201595x1.pdf [file cr201595x1.pdf]

## Supplementary Figures and Tables

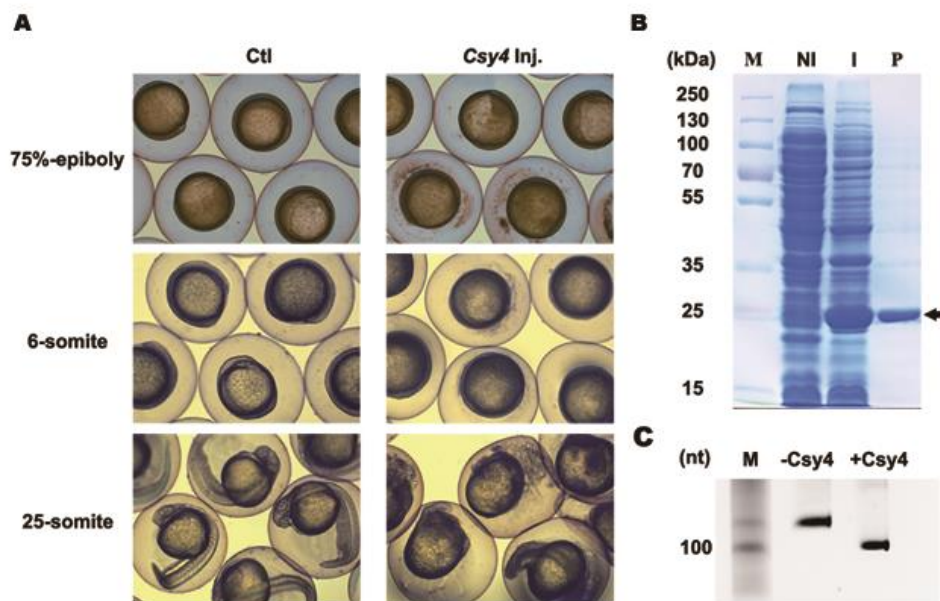

**Figure S1. Injection of *Csy4* mRNA results in severe malformation in zebrafish and expression of *Csy4* protein.** (A) Injection of *csy4* mRNA in zebrafish lead to serious malformation at about 25-somite stage. Inj. is short for injection. (B) 10% SDS-PAGE analysis of IPTG-induced (I=induced) or not induced (NI= not induced) *Csy4* expression. Black arrow indicates purified *Csy4* protein (P=purified) with Ni-NTA affinity resin. (C) Pre-gRNAs can be cleaved by expressed *Csy4* protein *in vitro*. Products were separated with 12% urea denaturing PAGE.
