# Supplementary material
Source: PubMed Central journal article supplement (PMC4559817)
Supplement: cr201595x2.pdf [file cr201595x2.pdf]

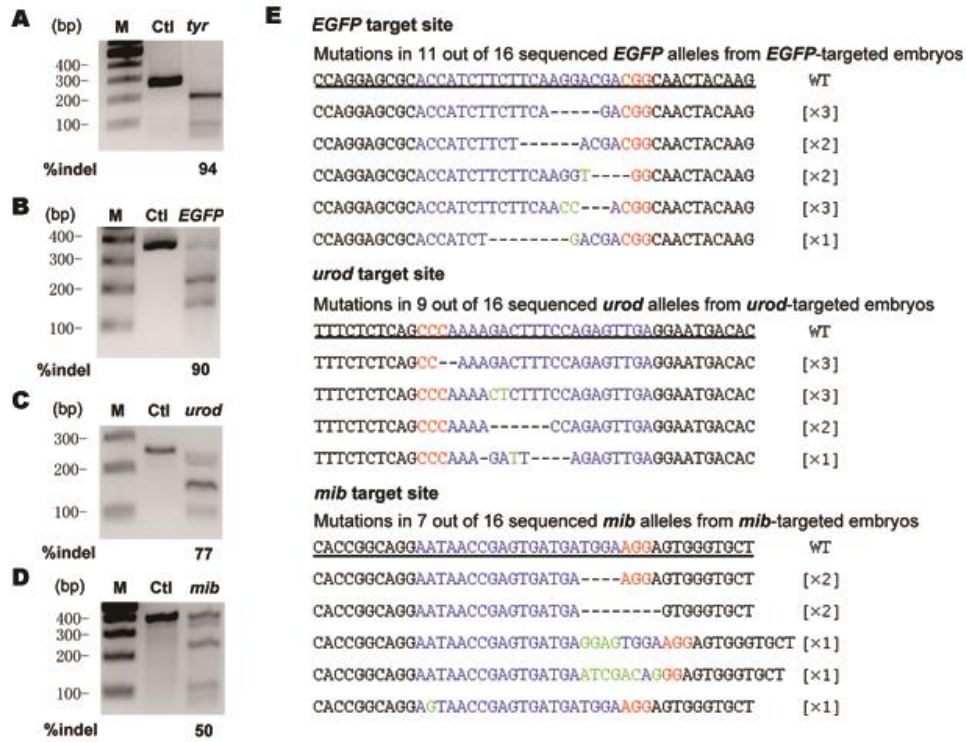

**Figure S2. T7 endonuclease I assays and sequencing results of different Cas9/gRNAs**

**injected F<sub>0</sub> embryos.** (A-D) T7EI assays of different Cas9/gRNAs injected F<sub>0</sub> embryos. 6

embryos were picked up randomly from each group. (E) Sequences of Cas9-induced mutations

in the *EGFP*-, *urod*-, *mib*- targeted founder embryos. 16 samples were sequenced in each

group. Blue color represents target sequence; red color indicates PAM region; “-” indicates

deletion; green color indicates mutations. The number in brackets represents the times of the

identified mutant allele.
