# Supplementary material
Source: PubMed Central journal article supplement (PMC4559817)
Supplement: cr201595x4.pdf [file cr201595x4.pdf]

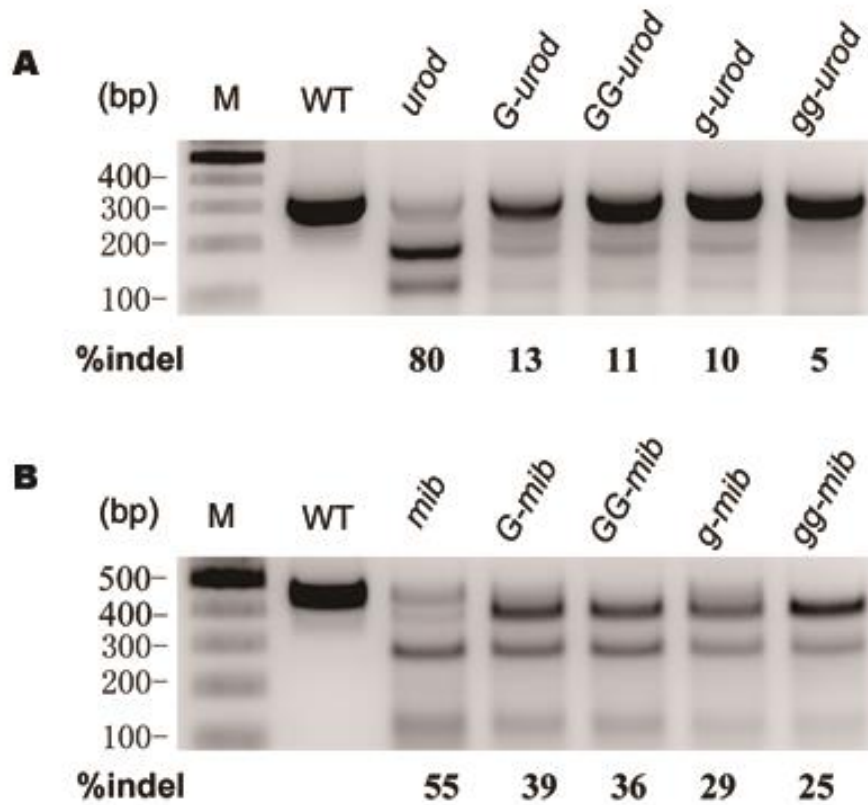

**Figure S4. Comparison of targeting efficiency of gRNAs produced by Csy4 and T7**

**polymerase with mismatches0** (A) Targeting efficiency of *urod* site analyzed by T7EI assays.

WT: the uninjected group; *G-urod*: one G nucleotide added at 5' end; *GG-urod*: two G nucleotides added at 5' end; *g-urod*: the first nucleotide was changed to "G"; *gg-urod*: the

initial two nucleotides were changed to "GG". (B) Targeting efficiency of *mib* site analyzed by

T7EI assays. "G", "GG", "g", "gg" represents the same meaning as the *urod* site.
